# Supplementary material
Source: PubMed Central journal article supplement (PMC2835226)
Supplement: mt2009102x1.pdf [file mt2009102x1.pdf]

**Supplemental Table S1. Spleen Analyses**

|        | <b>GC<sup>1</sup> Area (<math>\mu\text{m}^2</math>)</b> | <b>GC Number</b> | <b>GC Area/Total Area</b> | <b>Megakaryocyte Number</b> |
|--------|---------------------------------------------------------|------------------|---------------------------|-----------------------------|
| PBS    | 67832 $\pm$ 11722*                                      | 42 $\pm$ 6.9*    | 0.4 $\pm$ 0.048*          | 3.0 $\pm$ 0.7**             |
| AdNull | 63502 $\pm$ 8587*                                       | 38 $\pm$ 7.0*    | 0.39 $\pm$ 0.02*          | 1.7 $\pm$ 0.3**             |
| AdShhN | 58735 $\pm$ 9489                                        | 46 $\pm$ 4.4     | 0.3 $\pm$ 0.078           | 7.0 $\pm$ 1.9               |

<sup>1</sup> GC = germinal center

\* p>0.1, PBS/AdNull vs AdShhN

\*\* p<0.01, PBS/AdNull vs AdShhN
