# Supplementary material
Source: PubMed Central journal article supplement (PMC2835226)

### A. Peripheral blood Lin<sup>-</sup> c-Kit<sup>+</sup> cells

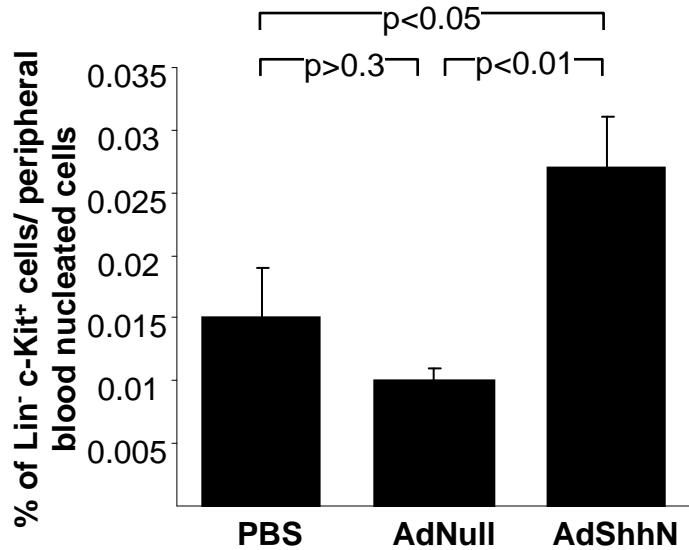

### B. Peripheral blood Lin<sup>-</sup> Sca-1<sup>+</sup> c-Kit<sup>+</sup> cells

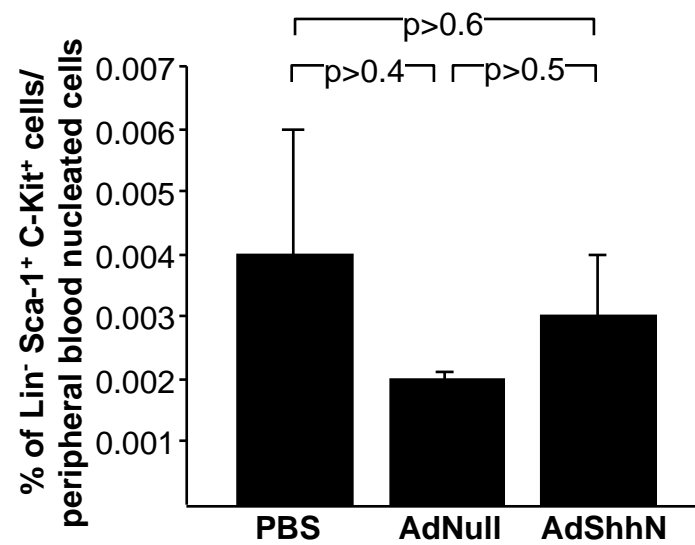

### C. Peripheral blood Lin<sup>-</sup> Sca-1<sup>-</sup> c-Kit<sup>+</sup> cells

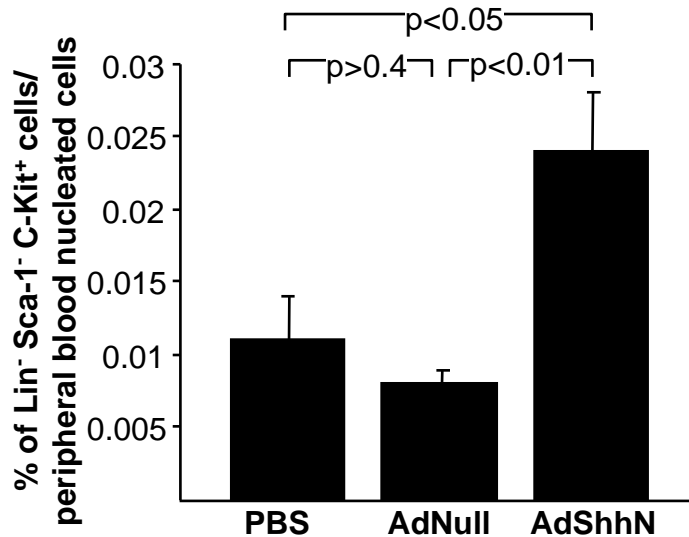

Supplement: mt2009102x7.pdf [file mt2009102x7.pdf]
