# Supplementary material
Source: PubMed Central journal article supplement (PMC2835226)

### Bone marrow lineages, treated recipients

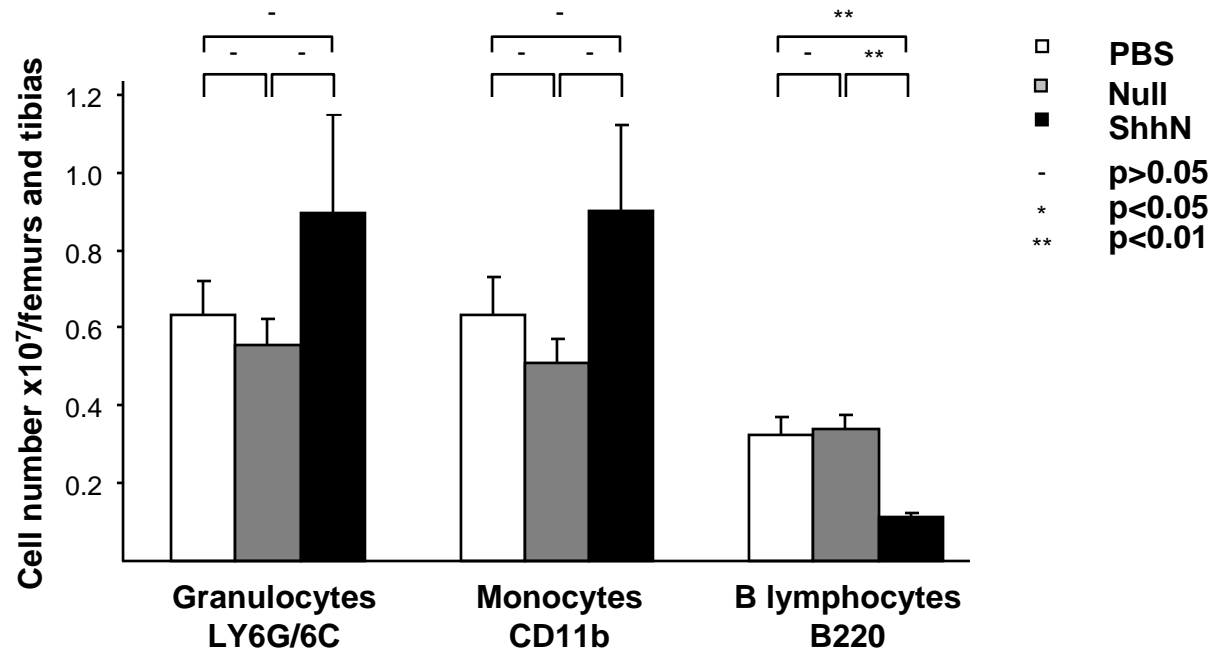

Supplement: mt2009102x10.pdf [file mt2009102x10.pdf]

## A. Serum Shh

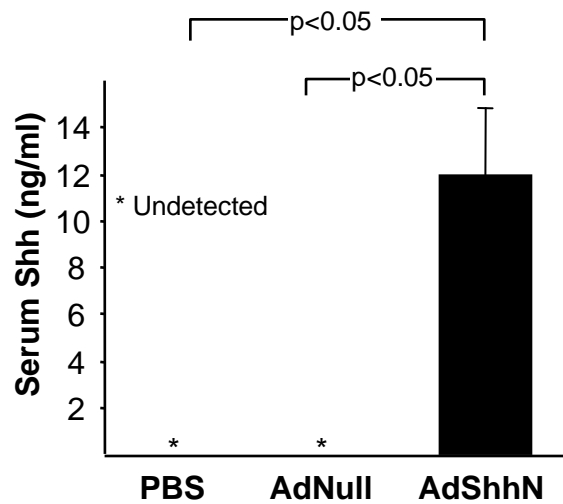

## B. Hair growth, gross examination

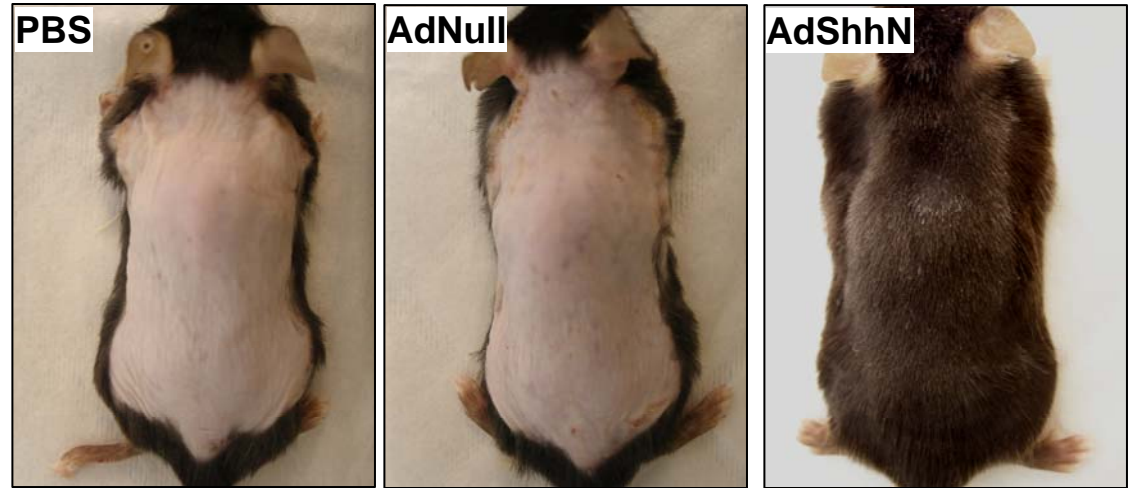

## C. Hair growth, histology

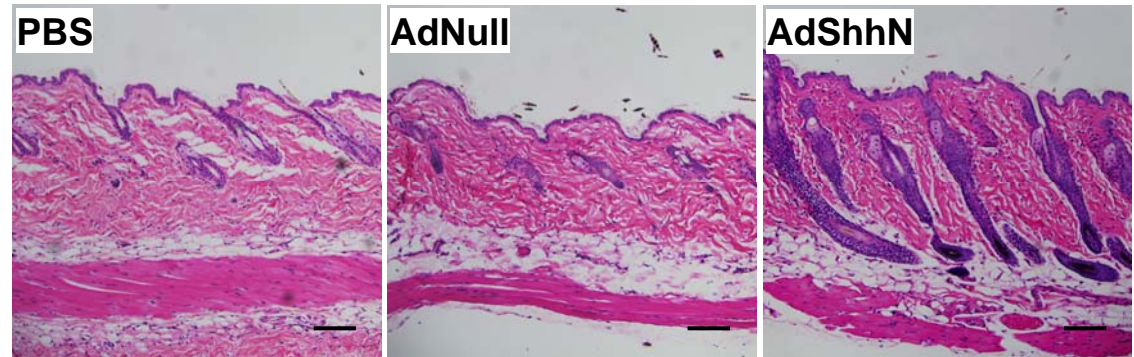

Supplement: mt2009102x2.pdf [file mt2009102x2.pdf]

## A. Bone morphology at 30 days

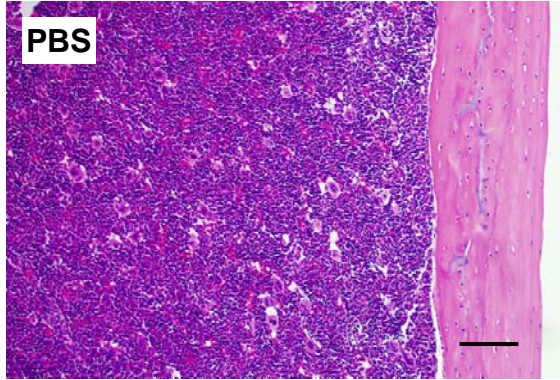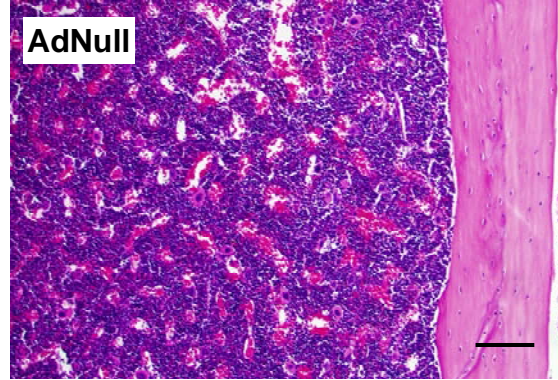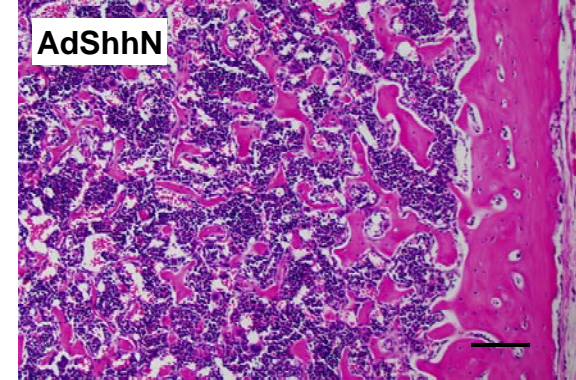

## B. Bone morphology at 8 months

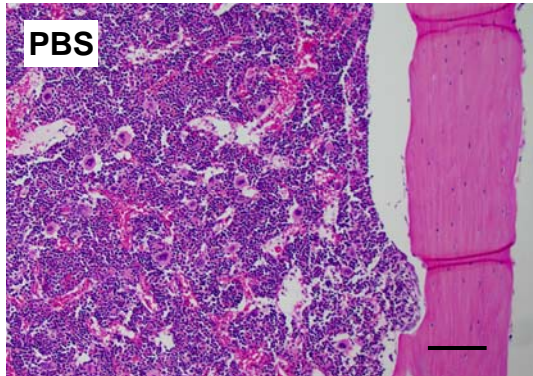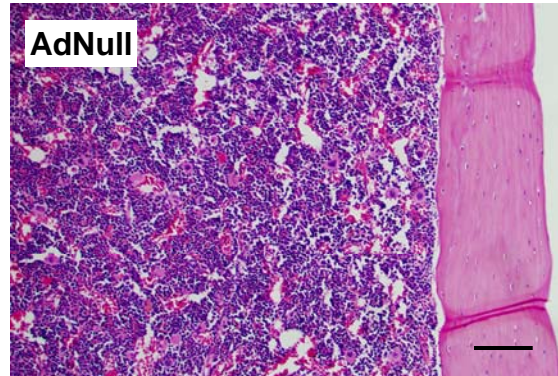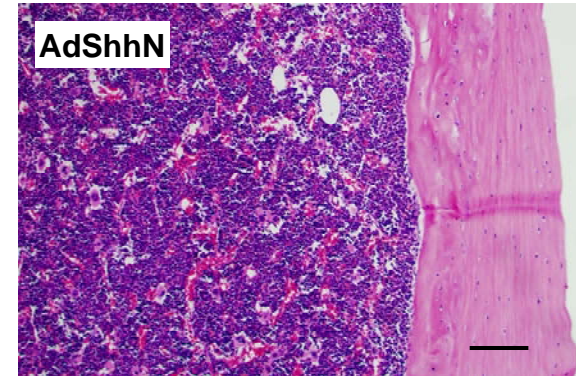

Supplement: mt2009102x3.pdf [file mt2009102x3.pdf]

## Serum Osteocalcin

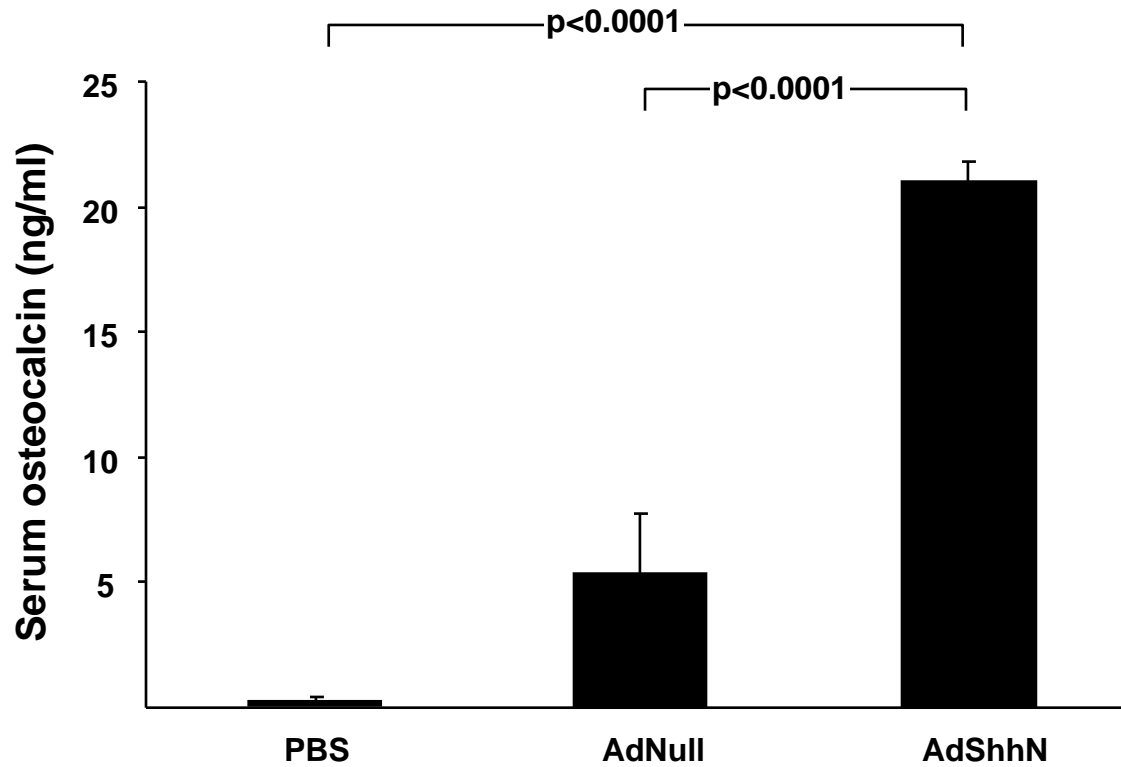

Supplement: mt2009102x4.pdf [file mt2009102x4.pdf]

## A. Bone marrow cell number

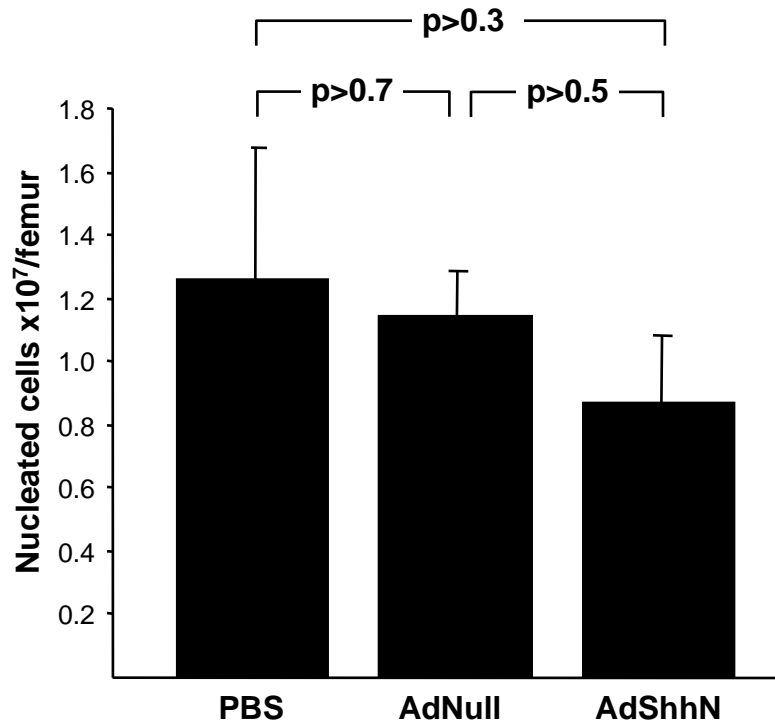

## B. Bone marrow Lin<sup>-</sup> Sca-1<sup>+</sup> c-Kit<sup>+</sup> cell number

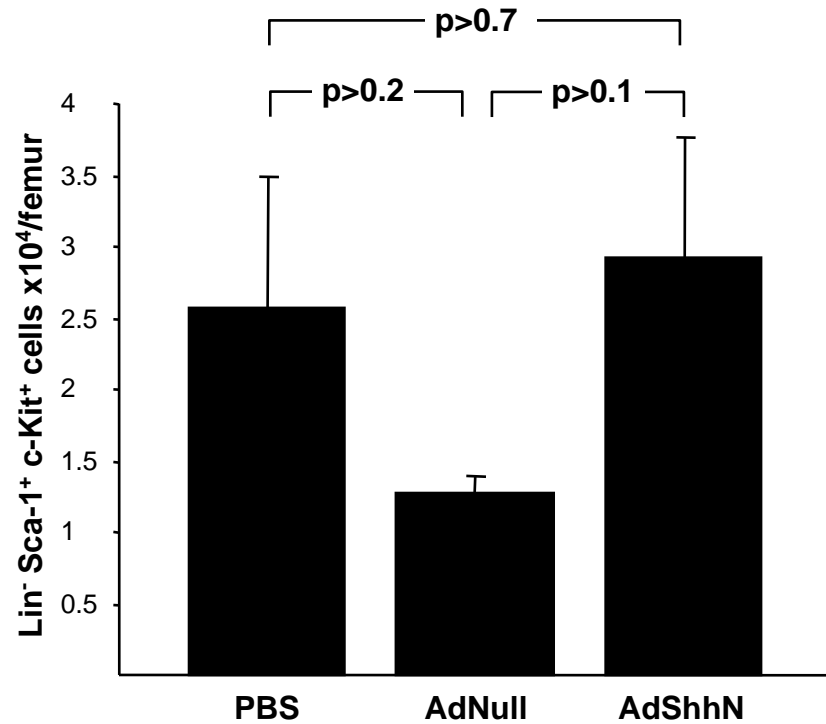

Supplement: mt2009102x5.pdf [file mt2009102x5.pdf]

### A. % of Lin<sup>-</sup> cells in G2/M

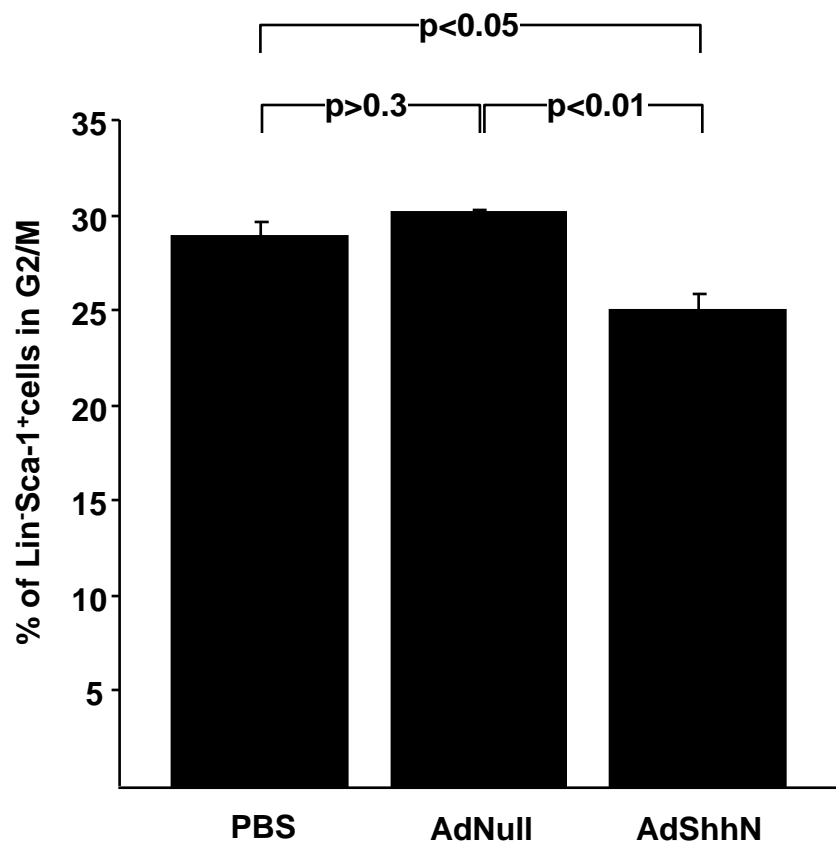

### B. % of Lin<sup>-</sup> CD34<sup>-</sup> Sca-1<sup>+</sup> c-Kit<sup>+</sup> cells

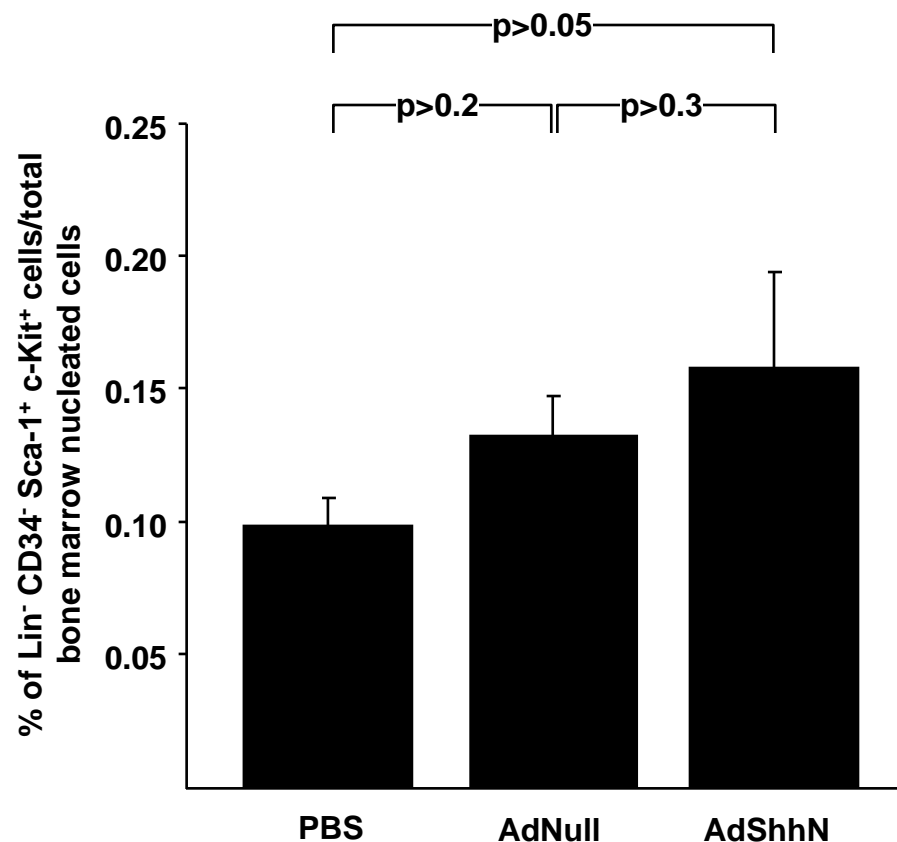

Supplement: mt2009102x6.pdf [file mt2009102x6.pdf]

**A. Spleen histology**

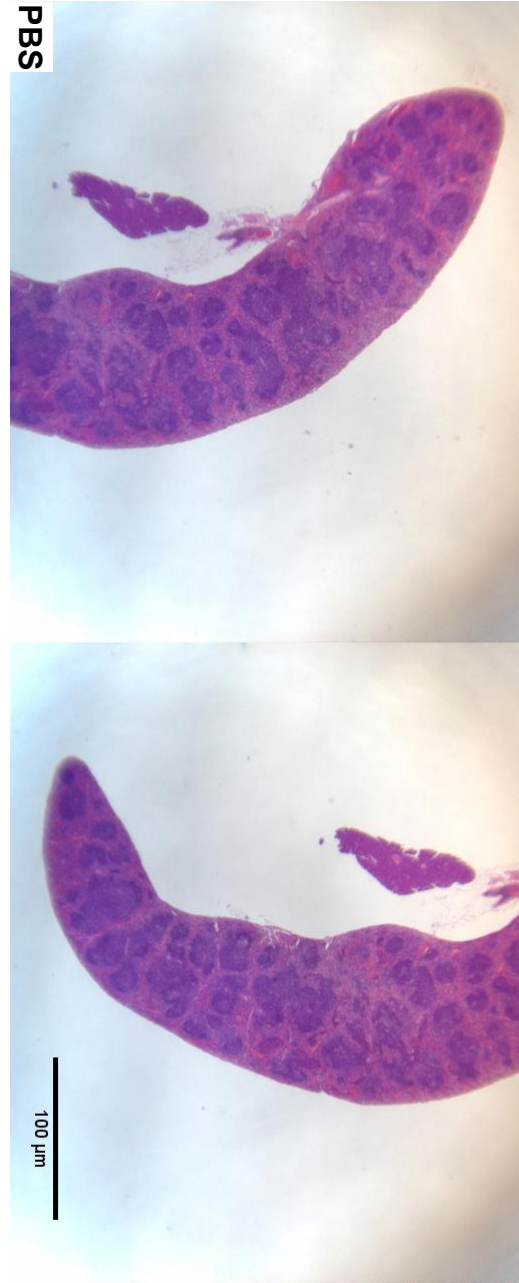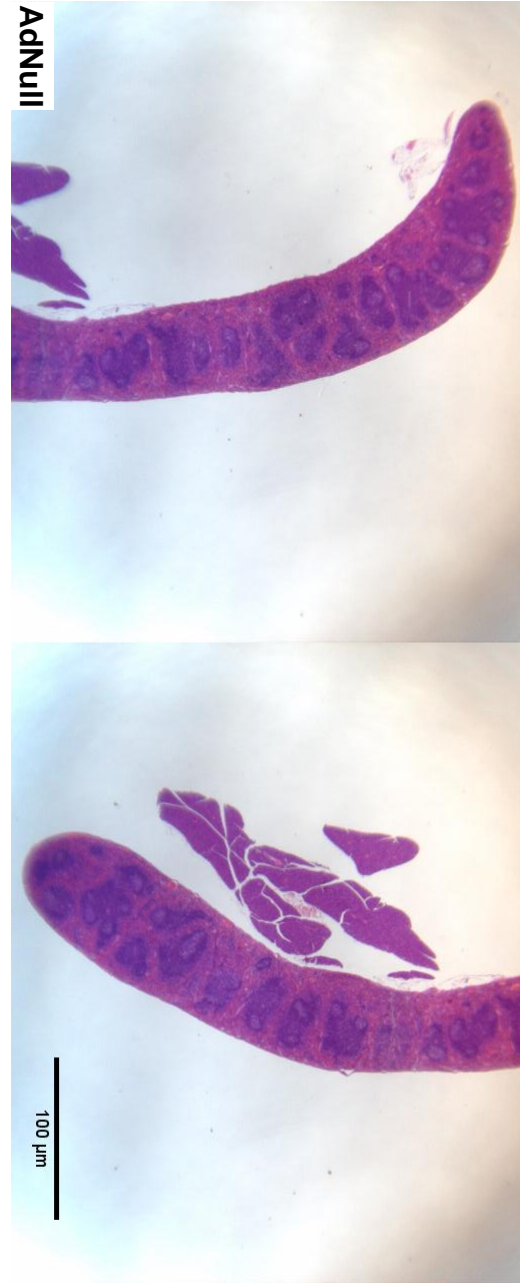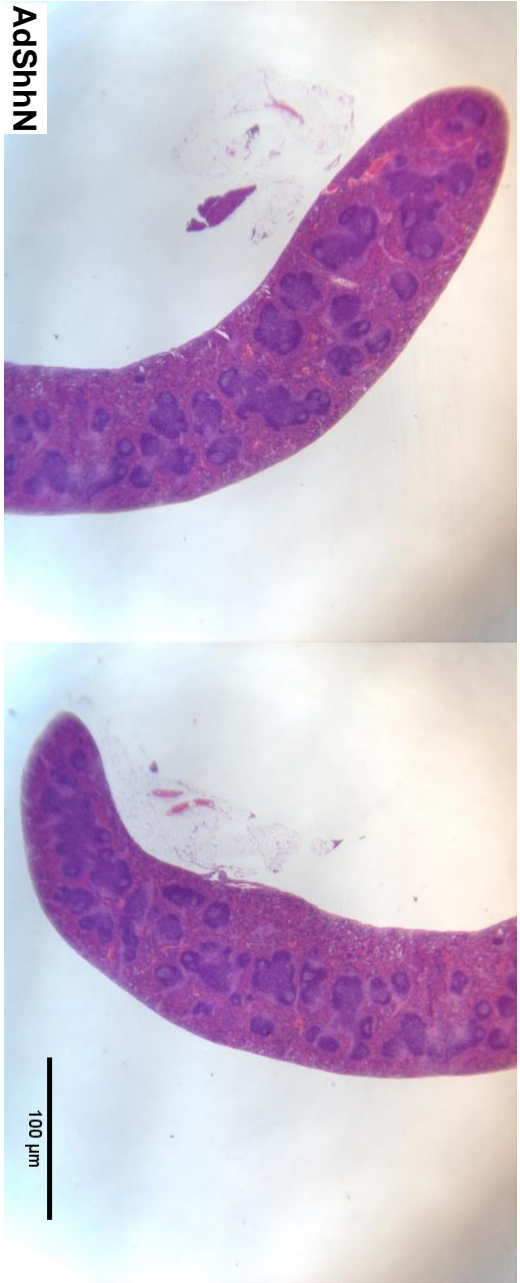

Supplement: mt2009102x8.pdf [file mt2009102x8.pdf]

## LTC-IC, Lin<sup>-</sup> cells from treated mice

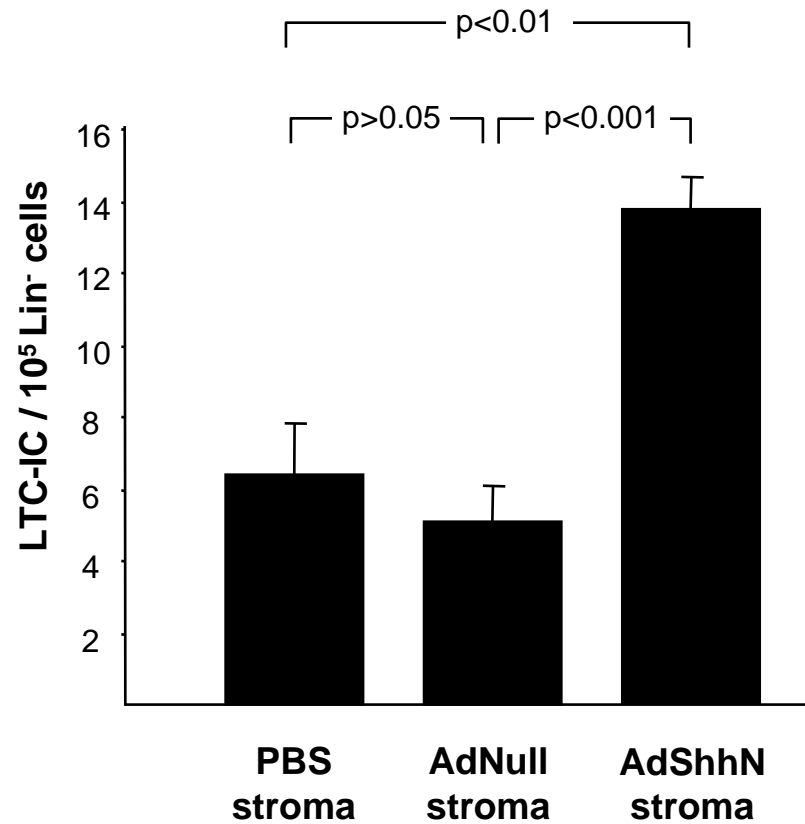

Supplement: mt2009102x9.pdf [file mt2009102x9.pdf]
